# Supplementary material for: VEGF-Targeted Multispectral Optoacoustic Tomography and Fluorescence Molecular Imaging in Human Carotid Atherosclerotic Plaques
Source: MDPI journal article supplement (doi:10.3390/diagnostics11071227), 2021-07-07
Supplement: s1 [file s1]

Supplementary Materials

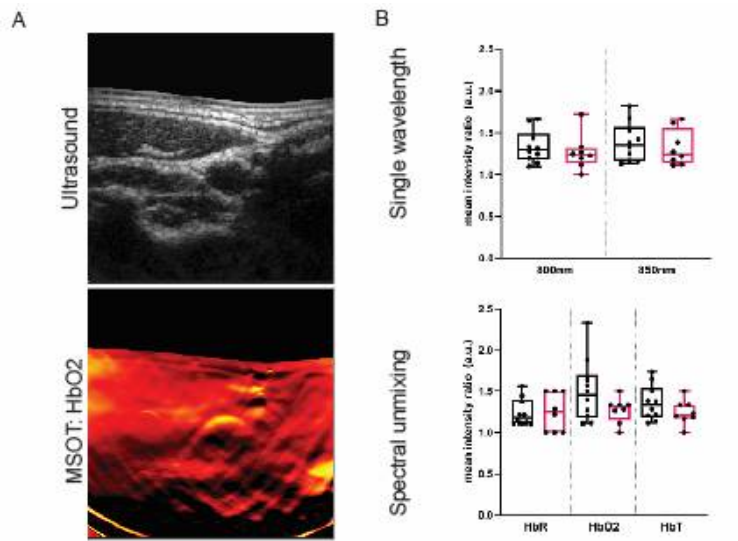

Figure S1: Healthy Volunteer Imaging. Representative image of intact bevacizumab-800CW at 150 kD. SDS-PAGE was performed on a fresh frozen tissue slice of a carotid surgical specimen collected directly after carotid endarterectomy.

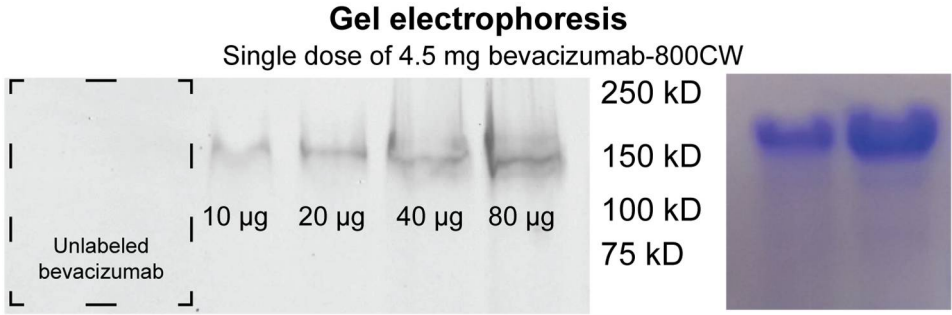

Figure S2: Gel electrophoresis. Representative image of healthy volunteer carotid artery imaging.
